## **SARS-CoV-2 genomic diversity in households highlights the challenges of sequence-based transmission inference**

**Authors:** Emily Bendall<sup>1</sup>, Gabriela Paz-Bailey<sup>2</sup>, Gilberto A. Santiago<sup>2</sup>, Christina A. Porucznik<sup>3</sup>, Joseph B. Stanford<sup>3</sup>, Melissa S. Stockwell<sup>4</sup>, Jazmin Duque<sup>5</sup>, Zuha Jeddy<sup>5</sup>, Vic Veguilla<sup>2</sup>, Chelsea Major<sup>2</sup>, Vanessa Rivera-Amill, PhD<sup>6</sup>, Melissa A. Rolfes<sup>2</sup>, Fatimah S. Dawood<sup>2</sup>, Adam S. Lauring<sup>1,7</sup> \*

**Affiliations:** <sup>1</sup>Department of Microbiology and Immunology, University of Michigan, Ann Arbor, MI, USA; <sup>2</sup>Centers for Disease Control and Prevention; <sup>3</sup>Division of Public Health, Department of Family and Preventive Medicine, University of Utah School of Medicine; <sup>4</sup>Division of Child and Adolescent Health, Department of Pediatrics, Columbia University Vagelos College of Physicians and Surgeons, and Department of Population and Family Health, Mailman School of Public Health, Columbia University Irving Medical Center, New York, NY; <sup>5</sup>Abt Associates; <sup>6</sup>Ponce Health Sciences University/Ponce Research Institute; <sup>7</sup>Division of Infectious Diseases, Department of Internal Medicine, University of Michigan, Ann Arbor, MI, USA;

\* **Corresponding Author:** Adam S. Lauring, MS2 4742C, SPC 1621, 1137 Catherine Street, Ann Arbor, MI 48109; (734) 764-7731; [alauring@med.umich.edu](mailto:alauring@med.umich.edu).

**Disclaimer:** The findings and conclusions in this report are those of the authors and do not necessarily represent the official position of the Centers for Disease Control and Prevention.

**Keywords:** SARS-CoV-2; genomic epidemiology; transmission; household

**Running Title:** SARS-CoV-2 diversity in households

**Abstract Word Count:** 200

**Main Text Word Count:** 3009

**Summary:** High depth of coverage whole genome sequencing can identify SARS-CoV-2 transmission chains in settings where there is strong epidemiologic linkage but is not reliable as a stand-alone method for transmission inference.

1 **ABSTRACT**

2 **Background:** The reliability of sequence-based inference of SARS-CoV-2 transmission is not  
3 clear. Sequence data from infections among household members can define the expected  
4 genomic diversity of a virus along a defined transmission chain.

5  
6 **Methods:** SARS-CoV-2 cases were identified prospectively among 2,369 participants in 706  
7 households. Specimens with an RT-PCR cycle threshold  $\leq 30$  underwent whole genome  
8 sequencing. Intra-host single nucleotide variants (iSNV) were identified at  $\geq 5\%$  frequency.  
9 Phylogenetic trees were used to evaluate the relationship of household and community  
10 sequences.

11  
12 **Results:** There were 178 SARS-CoV-2 cases in 706 households. Among 147 specimens  
13 sequenced, 106 yielded a whole genome consensus with coverage suitable for identifying iSNV.  
14 Twenty-six households had sequences from multiple cases within 14 days. Consensus  
15 sequences were indistinguishable among cases in 15 households, while 11 had  $\geq 1$  consensus  
16 that differed by 1-2 mutations. Sequences from households and the community were often  
17 interspersed on phylogenetic trees. Identification of iSNV improved inference in 2 of 15  
18 households with indistinguishable consensus sequences and 6 of 11 with distinct ones.

19  
20 **Conclusions:** In multiple infection households, whole genome consensus sequences differed by  
21 0-1 mutations. Identification of shared iSNV occasionally resolved linkage, but the low genomic  
22 diversity of SARS-CoV-2 limits the utility of “sequence-only” transmission inference.

23

## 24 INTRODUCTION

25 RNA viruses evolve rapidly and accumulate mutations as outbreaks grow [1]. As a result, the  
26 evolutionary relationships among sequenced cases hold important information about the  
27 processes that drive epidemics [2]. For example, sequence data can help define transmission  
28 chains and outbreaks [3–5], the timing and location of viral introductions into communities [6–  
29 8], and larger patterns of spread [9–12]. Over the course of the COVID-19 pandemic, SARS-CoV-  
30 2 sequences have been used to infer transmission linkage in hospitals and other congregate  
31 settings [13–18]. Inferring these linkages with high confidence is necessary for subsequent  
32 studies of the biology of transmission and effectiveness of mitigation strategies.

33  
34 To infer transmission, one can ask whether the sequences within a group of close contacts,  
35 such as a household, are more similar than sequences in the broader community. This approach  
36 depends on both the granularity of the sequence data and the amount of genomic diversity in  
37 the underlying community or meta-population. The relatedness of viral sequences identified  
38 from potential transmission chains versus community virologic surveillance is compared using  
39 phylogenetic trees of whole genome consensus sequences or clustering of transmission-  
40 associated sequences [2]. In the setting of insufficient community sampling and/or low genomic  
41 diversity, consensus trees can miss true linkages and identify false ones. Greater coverage  
42 sequencing can improve resolution by identifying intrahost single nucleotide variants (iSNV) in  
43 host-derived viral populations that have yet to achieve consensus levels, or >50% within-host  
44 frequency, along a transmission chain [19,20]. While these approaches have proven useful for  
45 influenza and other viruses, the reliability of sequence-based inference of SARS-CoV-2

46 transmission is less clear. For example, we and others have found that participants without  
47 known epidemiologic linkage can share indistinguishable consensus sequences and even  
48 minority (<50%) iSNV [21–23].

49  
50 Households are ideal settings for studies of the biology and epidemiology of viral transmission.  
51 Documentation of close contact and concurrent symptoms or test positivity provide strong  
52 epidemiologic evidence of within-household transmission. Sequence data from infected  
53 participants can therefore define the expected genomic diversity of a virus along a transmission  
54 chain and inform sequence-based studies in other transmission settings, where epidemiologic  
55 linkage may be uncertain. Here, we use whole genome sequencing of SARS-CoV-2 populations  
56 from participants in two prospective household studies of COVID-19 that were conducted at  
57 three sites. To assess the utility of SARS-CoV-2 sequence data as a tool for inferring  
58 transmission, we used phylogenetic analysis of sequences from households with at least two  
59 SARS-CoV-2 infection cases to assess the clustering of within-household sequences relative to  
60 contemporaneous community sequences. We used iSNV to further resolve transmission  
61 linkages in selected households.

62

## 63 **METHODS**

### 64 **Cohorts**

65 The Coronavirus Household Evaluation and Respiratory Testing (C-HEaRT) study enrolled  
66 households in Utah (Salt Lake, Weber, Davis, Box Elder, Cache, Tooele, Wasatch, Summit, Utah,  
67 and Iron Counties) and New York City [24] during August 2020 through February 2021 and

68 followed them with surveillance for SARS-CoV-2 infection during September 2020 through  
69 August 2021. The Communities Organized for the Prevention of Arboviruses (COPA) was  
70 expanded to include investigation of the epidemiology of COVID-19, creating the COCOVID  
71 study, and recruited households in Ponce, Puerto Rico. For C-HEaRT, household eligibility  
72 criteria included:  $\geq 1$  child aged 0-17 years,  $\geq 75\%$  of household members met individual level  
73 eligibility (all members if a 2- or 3-person household), one adult member was willing to  
74 complete monthly questionnaires, and adult members could communicate in English or  
75 Spanish. Individual eligibility criteria included: anticipated residence in the household for  $\geq 3$   
76 consecutive months, and willingness to complete study surveys, weekly symptom assessments,  
77 and self-collect respiratory specimens. For COCOVID, household members were eligible if they  
78 were aged  $\geq 1$  year, slept in the house  $\geq 4$  nights per week, had no definite plans to move in the  
79 next year, and were willing and able to comply with study requirements. For both studies,  
80 written informed consent (paper or electronic) was obtained from adults (aged  $>18$  years in C-  
81 HEaRT and  $>20$  years in COCOVID). Parents or legal guardians of minor children provided  
82 written informed consent on behalf of their children; older children (aged 12–17 years in C-  
83 HEaRT and 7–20 years in COCOVID) also provided assent to study participation. The C-HEaRT  
84 study protocol was reviewed and approved by the University of Utah Institutional Review Board  
85 (IRB) as the single IRB for all collaborators. The COCOVID study protocol was reviewed and  
86 approved by the Ponce Medical School Foundation, Inc. IRB.

87

## 88 **Sample Collection and Testing**

89 Participants were asked to self-collect (or parent/guardian-collect for children) mid-turbinate  
90 nasal swabs every week, regardless of illness symptoms, and place the swabs in viral transport  
91 media. Participants were also contacted by text message or email every week to ascertain if  
92 they had COVID-19-like (CLI) or any other illness symptoms; they were asked to self-collect an  
93 additional mid-turbinate flocked nasal swab once with onset of CLI symptoms. CLI was defined  
94 as 1 or more of the following: fever or feverishness, cough, shortness of breath, sore throat,  
95 diarrhea, muscle aches, chills, or change in taste or smell. Respiratory specimens were shipped  
96 overnight to a central lab and tested using either the Quidel Lyra SARS-CoV-2 Assay or the  
97 ThermoFisher Combo Kit platform. The assays were approved under Emergency Use  
98 Authorization for the diagnosis of SARS-CoV-2 infection prior to use in this study. Test-positive  
99 infections in the same household that were first detected by RT-PCR within 14 days of each  
100 other (including those detected on the same date) were considered epidemiologically linked  
101 and likely to have resulted from within-household transmission.

102

### 103 **SARS-CoV-2 Genomic Sequencing**

104 SARS-CoV-2 genomic sequencing was attempted on all specimens with an RT-PCR cycle  
105 threshold (Ct)  $\leq 30$  on either the nucleocapsid protein 1 or 2 target. SARS-CoV-2 genomes were  
106 sequenced as described previously [10]. Briefly, RNA was extracted from midturbinate nasal  
107 swab specimens with the MagMax MVPII viral nucleic acid isolation kit on a Kingfisher Flex  
108 (Thermofisher) and reverse transcribed with Lunascript (NEB). We amplified SARS-CoV-2 cDNA  
109 in two pools using the ARTIC Network v3 primers and protocol. Amplicon pools were combined  
110 in equal volumes for a given sample and purified with magnetic beads. Barcoded sequencing

111 libraries were prepared using the NEBNext ARTIC SARS-CoV-2 Library Prep Kit with magnetic  
112 bead size selection. Individual barcoded sample libraries were pooled (up to 96) and sequenced  
113 on an Illumina MiSeq (v2 chemistry, 2x250 cycles).

114

115 Reads were mapped to the Wuhan/Hu-1/2019 reference genome (GenBank MN908947.3) with  
116 BWA-MEM [25]. We used iVar 1.2.1 [26] to trim ARTIC amplification primer sequences and to  
117 determine consensus sequences using bases with >50% frequency and placing a designated  
118 unknown base N at positions covered by fewer than 10 reads. Genomes with 29,000 or more  
119 unambiguous bases (> 97% completeness) were used in downstream analysis. We identified  
120 iSNV with iVar using the following parameters: sample with a minimum consensus genome  
121 length of 29,000 bases; sample with an average genome sequencing coverage depth of greater  
122 than 200 reads per position; iSNV frequency of 5–95%; read depth of 400 at iSNV sites with a  
123 Phred score of >30; iVar p-value of <0.00001. We masked sites commonly affected by  
124 sequencing errors in both consensus sequences and iSNV calls [27].

125

## 126 **Phylogenetic Analysis**

127 Consensus sequences for each household were placed on the global SARS-CoV-2 phylogenetic  
128 tree using UShER [28]. The tree versions used were from the week of 14 February 2022 and  
129 included over 7.8 million genome sequences from GISAID, GenBank, COG-UK and CNCB. The  
130 level of genomic sampling of the state or territory of each study site (Figure 1) was estimated  
131 with subsampler [10] using case data and GISAID submission data. Subtrees were initially  
132 constructed with 30 samples and then reconstructed with additional samples as needed to

133 visualize all genomes from a household in a single subtree (e.g., when samples existed within  
134 large clusters of indistinguishable samples). The JSON files for each master tree and subtree are  
135 available in Supplemental Dataset 1 and can be visualized in the auspice viewer at  
136 <https://auspice.us/>. Trees were annotated and edited in FigTree using the subtree.nwk files  
137 generated by UShER.

138

### 139 **Data and materials availability**

140 The consensus genomes that we generated for this study are publicly available on  
141 [https://github.com/lauringlab/SARS-CoV-2\\_Household\\_Diversity\\_Accessions](https://github.com/lauringlab/SARS-CoV-2_Household_Diversity_Accessions). Those for the  
142 community sequences (largely from GISAID) can be found in the pdf tree files  
143 (“<Household\_ID>.pdf”) in Supplemental Dataset 1. Laboratories responsible for submissions  
144 are acknowledged in Supplemental Table 1. Analysis code for the generation of consensus  
145 sequences and phylogenetic analysis are available at [https://github.com/lauringlab/SARS-CoV-2\\_Household\\_Diversity](https://github.com/lauringlab/SARS-CoV-2_Household_Diversity).

147

### 148 **RESULTS**

149 The C-HEaRT (Utah and New York City) and COCOVID (Puerto Rico) studies performed active  
150 surveillance for SARS-CoV-2 infection and CLI in 706 households with 2,369 participants (Table  
151 1). During September 2020 through August 2021, the cumulative incidence of SARS-CoV-2  
152 infection was 11% [96/842 participants in 41/190 (22%) households under surveillance] at the  
153 Utah site and 7% [33/499 participants in 13/135 (10%) households] at the New York City site;



154 during June 2020 through September 2021, cumulative incidence was 5% at the Puerto Rico site  
155 (49/1028 infections detected in 28/381 households).

156  
157 Of the 191 participants with SARS-CoV-2 infections in these households, 147 (77%) in 70  
158 households had samples with a Ct value <30 that were processed for whole genome  
159 sequencing, of whom, 106 (72%) had samples that were successfully sequenced to sufficient  
160 breadth and depth of coverage (see Methods). Of the 706 households at the three sites, 56  
161 included  $\geq 2$  participants who were test-positive within a 14-day period, suggestive of within-  
162 household transmission (Table 1). Twenty-six households had high quality sequence data on  $\geq 2$   
163 of these contemporaneous infections. The SARS-CoV-2 clades and lineages identified (Table 2)  
164 were the same among participants of the same household and reflect viruses circulating in the  
165 corresponding time periods in the United States ([www.outbreak.info](http://www.outbreak.info))(Table 2).

166  
167 We first used phylogenetic analysis of whole genome sequences to infer transmission linkage  
168 within these 26 households. We used Usher [28] to obtain local sequences for each household  
169 and to place household sequences simultaneously on a phylogenetic tree. Over 7.8 million  
170 whole genome SARS-CoV-2 sequences were available at the time of this analysis. Because most  
171 of these contextual sequences were from GISAID, we estimated the level of sampling at each  
172 study site over time by dividing the number of GISAID sequences by the number of reported  
173 cases [10]. Sampling of locally circulating viruses was low in 2020 (<2% cases sequenced) and  
174 increased at all three sites beginning in early 2021 (>5% cases sequenced, Figure 1). In 2022,  
175 Utah was generally better sampled (~10-30%) than New York or Puerto Rico (5-15%).

176

177 In 15 out of the 26 households that we studied, the consensus sequences of all cases were  
178 indistinguishable and grouped together on their respective trees (representative trees in Figure  
179 2, additional trees in Supplemental Figures 1-4). Given the epidemiologic linkage in the same  
180 household, these can be considered sequence-confirmed transmission events. However, we  
181 also found several trees in which these monophyletic groupings also included indistinguishable,  
182 contemporaneous sequences from non-household members within the community of the same  
183 locality (see trees in Figure 2). In two of the New York households, there were many such  
184 sequences during a B.1.526 (Iota) variant wave (Supplemental Figures 1 and 2). Therefore, even  
185 with a modest level of sampling (Figure 1), it is not uncommon to find indistinguishable viral  
186 sequences from participants at the same region and time who presumably lack a documented  
187 epidemiologic linkage.

188

189 In 11 households, the consensus sequences of the virus from one or more household members  
190 differed at 1-2 positions over the nearly 30kb genome. This is not uncommon in transmission  
191 chains, particularly ones that are longer or in which the samples are collected 7-14 days apart  
192 (see Table 2 for time span). In nearly all cases, the trees from these households demonstrated  
193 linkage and/or an ancestor/descendant relationship for the viral sequences (representative  
194 trees in Figure 3, additional trees in Supplemental Figure 5). In some cases, the household  
195 lineages were phylogenetically distinct from contemporaneous local sequences (e.g., UT2, UT4).  
196 These tree structures supported transmission linkage, but low sampling of community cases  
197 makes it hard to rule out missed linkages between members of the household and the larger

198 community. Indeed, there were some households in which there were sequences from the  
199 larger community included among the same branches of the within-household sequences (e.g.,  
200 UT10, PR3). As above, the low genomic diversity of SARS-CoV-2 and modest sampling of  
201 community cases made it difficult to define a threshold to effectively rule in or rule out  
202 transmission.

203  
204 We next determined whether transmission inference could be improved by identifying iSNV  
205 that were shared among members of a household. These would manifest as polymorphic sites  
206 where the alternative allele, or mutation, is present but not fixed in the transmission chain.  
207 While there was just one household where two participants shared a minority iSNV (PR5, Figure  
208 4), several had iSNV in at least one individual at a consensus level (i.e., frequency >0.5), but that  
209 had not yet achieved fixation (i.e., frequency >0.95). In the 15 households with  
210 indistinguishable consensus sequences, each of the two participants in households NY5 and PR5  
211 shared an iSNV that was consensus level, but not fixed. In three (UT12, UT5, UT3) out of the 11  
212 households with distinct consensus sequences (Table 2), the consensus differences were due to  
213 one or more participants having a non-reference iSNV that achieved consensus level, but not  
214 fixation. Household UT4 had two participants with consensus level iSNV (Figure 4). In household  
215 PR3, there was one site where one out of four members had a consensus level iSNV and  
216 another member had this as a fixed mutation.

217

218 **DISCUSSION**

219 We evaluated the utility of SARS-CoV-2 sequence data in transmission inference using data  
220 from two studies of household cohorts at three sites. In the household setting, where at least  
221 two incident infections occurring within 14 days of one another are strongly suggestive of  
222 transmission, we found that sequencing generally confirmed transmission linkage. The whole  
223 genome consensus sequences of participants within a household were nearly always  
224 indistinguishable or differed by one mutation. In some cases, these links were further  
225 supported by the identification of iSNV shared among members of the household. Out of the 26  
226 households evaluated, there was just one (UT10) in which the high average number of  
227 consensus differences (two) and absence of shared iSNV called linkage into doubt. Importantly,  
228 we frequently found multiple sequences from the community that were indistinguishable to  
229 those within the household with even modest sampling (<5%) over the course of the pandemic.  
230 This highlights the limits of “sequence-only” inference of transmission in hospitals or other  
231 congregate settings where epidemiologic linkage is less certain.

232  
233 Strengths of the study include our reliance on samples from active surveillance of longitudinal  
234 cohorts and our use of quality controlled, deep sequencing. With weekly sampling of all  
235 participants from a household, we were able to identify asymptomatic or mildly symptomatic  
236 cases and avoid some of the bias of case-ascertainment studies, in which cases are recruited  
237 based on a test-positive index. Together with our use of contemporaneous community  
238 specimens collected from participants not in the households but from the same site, our data  
239 provide a valuable benchmark for the expected SARS-CoV-2 diversity in households relative to  
240 that in the community. The cohorts are also drawn from diverse geographic areas with varied

241 household sizes and composition [21,29]. Our assessment of viral diversity is strengthened by  
242 our criteria for identifying consensus and minority iSNV [22]. The low observed diversity in this  
243 study, in part, reflects the stringent thresholds applied to the sequence data . This conservative  
244 approach reduces sequencing errors, which can be systematic and lead to incorrect  
245 ascertainment of shared iSNV among unrelated participants [21–23,30].

246  
247 This study had several notable limitations. First, we were relatively stringent in our criteria for  
248 identifying iSNV and therefore may have underascertained shared diversity in the rare (<5%)  
249 variant fraction within households. Second, given the limited number of households with  
250 sequenced cases, we were unable to formulate a statistically robust approach to sequence-  
251 based inference with clear cut-offs and associated positive and negative predictive values. Case-  
252 ascertained cohorts or contact tracing studies offer a more efficient way to capture and  
253 sequence many putative transmission pairs and will be useful as a setting in which to further  
254 develop this approach. Third, while we believe that our data provide an important framework  
255 for interpreting sequence data in studies of SARS-CoV-2 transmission, data from households  
256 may not translate completely to hospitals and other congregate living settings, which may differ  
257 in case density, contact frequency, and force of infection. Fourth, we assumed that household  
258 cases testing positive for SARS-CoV-2 within 14 days of one another were linked by  
259 transmission. If these cases represented distinct introductions into the household, we could  
260 overestimate expected within-household diversity. Fifth, it is possible, but in our opinion  
261 unlikely, that some of the community cases in our analysis actually had an epidemiologic  
262 linkage to participants in these households.

263  
264 Despite the limitations identified in this study, integration of sequence and epidemiologic data  
265 can be a powerful approach to studies of SARS-CoV-2 transmission. In settings where there is  
266 strong epidemiologic linkage among cases (e.g., known exposure or clear temporal and spatial  
267 association), indistinguishable consensus sequences with or without shared iSNV should be  
268 confirmatory. In these situations, single mutation differences among consensus sequences in a  
269 cluster are not uncommon; mutations can fix along a transmission chain, particularly longer  
270 ones over a greater timespan. However, if epidemiologic linkage is less certain, sequence  
271 identity can only confirm transmission if the metapopulation is highly sampled and genetically  
272 diverse. For example, early in the pandemic when circulating SARS-CoV-2 diversity was low,  
273 many inpatients and employees in hospitals were found to share indistinguishable consensus  
274 sequences, and even iSNV, without any apparent epidemiologic linkage [22,31]. This contrasts  
275 with other studies of hospital outbreaks where the combination of contact tracing and  
276 sequence data confirmed suspected transmission chains and identified new ones. We expect  
277 that future studies of transmission in households, hospitals, and other congregate settings will  
278 benefit from Bayesian methods, which can integrate epidemiologic and sequence data for  
279 improved inference [32].

280

## 281 **ACKNOWLEDGMENTS**

282 We thank the participants in the C-HEaRT and COCOVID cohorts and all GISAID submitting  
283 laboratories. We acknowledge Anderson Britto for developing and suggesting the subsampler  
284 tool used to generate Figure 1.

285   **REFERENCES**

- 286   1.   Lauring AS. Within-Host Viral Diversity: A Window into Viral Evolution. *Annu Rev Virol*  
287       **2020**; 7:63–81.
- 288   2.   Kao RR, Haydon DT, Lycett SJ, Murcia PR. Supersize me: how whole-genome sequencing  
289       and big data are transforming epidemiology. *Trends Microbiol* **2014**; 22:282–291.
- 290   3.   Lemieux JE, Siddle KJ, Shaw BM, et al. Phylogenetic analysis of SARS-CoV-2 in Boston  
291       highlights the impact of superspreading events. *Science* **2021**; 371:eabe3261.
- 292   4.   Siddle KJ, Krasilnikova LA, Moreno GK, et al. Transmission from vaccinated individuals in a  
293       large SARS-CoV-2 Delta variant outbreak. *Cell* **2022**; 185:485-492.e10.
- 294   5.   Zeller M, Gangavarapu K, Anderson C, et al. Emergence of an early SARS-CoV-2 epidemic in  
295       the United States. *Cell* **2021**; 184:4939-4952.e15.
- 296   6.   Worobey M, Pekar J, Larsen BB, et al. The emergence of SARS-CoV-2 in Europe and North  
297       America. *Science* **2020**; 370:564–570.
- 298   7.   du Plessis L, McCrone JT, Zarebski AE, et al. Establishment and lineage dynamics of the  
299       SARS-CoV-2 epidemic in the UK. *Science* **2021**; 371:708–712.
- 300   8.   Candido DS, Claro IM, de Jesus JG, et al. Evolution and epidemic spread of SARS-CoV-2 in  
301       Brazil. *Science* **2020**; 369:1255–1260.
- 302   9.   Viana R, Moyo S, Amoako DG, et al. Rapid epidemic expansion of the SARS-CoV-2 Omicron  
303       variant in southern Africa. *Nature* **2022**; 603:679–686.

- 304 10. Alpert T, Brito AF, Lasek-Nesselquist E, et al. Early introductions and transmission of SARS-  
305 CoV-2 variant B.1.1.7 in the United States. *Cell* **2021**; 184:2595-2604.e13.
- 306 11. Valesano AL, Fitzsimmons WJ, Blair CN, et al. SARS-CoV-2 Genomic Surveillance Reveals  
307 Little Spread From a Large University Campus to the Surrounding Community. *Open Forum*  
308 *Infect Dis* **2021**; 8:ofab518.
- 309 12. Aggarwal D, Warne B, Jahun AS, et al. Genomic epidemiology of SARS-CoV-2 in a UK  
310 university identifies dynamics of transmission. *Nat Commun* **2022**; 13:751.
- 311 13. Lucey M, Macori G, Mullane N, et al. Whole-genome Sequencing to Track Severe Acute  
312 Respiratory Syndrome Coronavirus 2 (SARS-CoV-2) Transmission in Nosocomial Outbreaks.  
313 *Clin Infect Dis* **2021**; 72:e727–e735.
- 314 14. Francis RV, Billam H, Clarke M, et al. The Impact of Real-Time Whole-Genome Sequencing  
315 in Controlling Healthcare-Associated SARS-CoV-2 Outbreaks. *J Infect Dis* **2022**; 225:10–18.
- 316 15. Meredith LW, Hamilton WL, Warne B, et al. Rapid implementation of SARS-CoV-2  
317 sequencing to investigate cases of health-care associated COVID-19: a prospective  
318 genomic surveillance study. *Lancet Infect Dis* **2020**; 20:1263–1271.
- 319 16. Hamilton WL, Fieldman T, Jahun A, et al. Applying prospective genomic surveillance to  
320 support investigation of hospital-onset COVID-19. *Lancet Infect Dis* **2021**; 21:916–917.
- 321 17. Arons MM, Hatfield KM, Reddy SC, et al. Presymptomatic SARS-CoV-2 Infections and  
322 Transmission in a Skilled Nursing Facility. *N Engl J Med* **2020**; 382:2081–2090.



- 323 18. Addetia A, Crawford KHD, Dingens A, et al. Neutralizing Antibodies Correlate with  
324 Protection from SARS-CoV-2 in Humans during a Fishery Vessel Outbreak with a High  
325 Attack Rate. *J Clin Microbiol* **2020**; 58:e02107-20.
- 326 19. McCrone JT, Woods RJ, Martin ET, Malosh RE, Monto AS, Lauring AS. Stochastic processes  
327 constrain the within and between host evolution of influenza virus. *eLife* **2018**; 7:e35962.
- 328 20. Worby CJ, Lipsitch M, Hanage WP. Shared Genomic Variants: Identification of Transmission  
329 Routes Using Pathogen Deep-Sequence Data. *Am J Epidemiol* **2017**; 186:1209–1216.
- 330 21. Braun KM, Moreno GK, Wagner C, et al. Acute SARS-CoV-2 infections harbor limited  
331 within-host diversity and transmit via tight transmission bottlenecks. *PLOS Pathog* **2021**;  
332 17:e1009849.
- 333 22. Valesano AL, Rumfelt KE, Dimcheff DE, et al. Temporal dynamics of SARS-CoV-2 mutation  
334 accumulation within and across infected hosts. *PLOS Pathog* **2021**; 17:e1009499.
- 335 23. Tonkin-Hill G, Martincorena I, Amato R, et al. Patterns of within-host genetic diversity in  
336 SARS-CoV-2. *eLife* **2021**; 10:e66857.
- 337 24. Dawood FS, Porucznik CA, Veguilla V, et al. Incidence Rates, Household Infection Risk, and  
338 Clinical Characteristics of SARS-CoV-2 Infection Among Children and Adults in Utah and  
339 New York City, New York. *JAMA Pediatr* **2022**; 176:59.

- 340 25. Li H. Aligning sequence reads, clone sequences and assembly contigs with BWA-MEM.  
341 ArXiv13033997 Q-Bio **2013**; Available at: <http://arxiv.org/abs/1303.3997>. Accessed 31 July  
342 2020.
- 343 26. Grubaugh ND, Gangavarapu K, Quick J, et al. An amplicon-based sequencing framework  
344 for accurately measuring intrahost virus diversity using PrimalSeq and iVar. *Genome Biol*  
345 **2019**; 20:8.
- 346 27. De Maio N, Walker C, Borges R, Weilguny L, Slodkowitz G, Goldman N. Masking strategies  
347 for SARS-CoV-2 alignments. *Virological*. 2020; Available at:  
348 <https://virological.org/t/masking-strategies-for-sars-cov-2-alignments/480>. Accessed 10  
349 March 2022.
- 350 28. Turakhia Y, Thornlow B, Hinrichs AS, et al. Ultrafast Sample placement on Existing tRees  
351 (UShER) enables real-time phylogenetics for the SARS-CoV-2 pandemic. *Nat Genet* **2021**;  
352 53:809–816.
- 353 29. Walter KS, Kim E, Verma R, et al. Shared within-host SARS-CoV-2 variation in households.  
354 medRxiv **2022**; :2022.05.26.22275279.
- 355 30. Lythgoe KA, Hall M, Ferretti L, et al. SARS-CoV-2 within-host diversity and transmission.  
356 *Science* **2021**; :eabg0821.
- 357 31. Braun KM, Moreno GK, Buys A, et al. Viral Sequencing to Investigate Sources of SARS-CoV-  
358 2 Infection in US Healthcare Personnel. *Clin Infect Dis* **2021**; 73:e1329–e1336.

359 32. Lindsey BB, Villabona-Arenas ChJ, Campbell F, et al. Characterising within-hospital SARS-  
360 CoV-2 transmission events using epidemiological and viral genomic data across two  
361 pandemic waves. Nat Commun **2022**; 13:671.

362

363

364 **Table 1:** Distribution of SARS-CoV-2 test-positive cases across cohorts and households

365

|                                                         | New York<br>City | Utah     | Puerto<br>Rico |
|---------------------------------------------------------|------------------|----------|----------------|
| Number of Households                                    | 135              | 190      | 381            |
| Number of Participants                                  | 499              | 842      | 1028           |
| Median household size (range)                           | 4 (2-9)          | 4 (2-10) | 2 (1-6)        |
| Number of unique SARS-CoV-2-positive cases <sup>a</sup> | 33               | 96       | 49             |
| Households with 1 case                                  | 3                | 17       | 3              |
| Households with 2 cases <sup>b</sup>                    | 5                | 7        | 5              |
| Households with 3 cases <sup>b</sup>                    | 3                | 5        | 8              |
| Households with 4 cases <sup>b</sup>                    | 0                | 4        | 6              |
| Households with 5 cases <sup>b</sup>                    | 1                | 4        | 5              |
| Households with 6 cases <sup>b</sup>                    | 1                | 0        | 1              |
| Households with 7 cases <sup>b</sup>                    | 0                | 1        | 0              |
| # of cases with sequence data / # sequenced             | 28/29            | 52/86    | 26/32          |

<sup>a</sup> total number over study period

<sup>b</sup> only households with cases testing positive within 14 days of each other

366

367 **Table 2:** Households with two or more incident SARS-CoV-2 infections within a 14- day period  
 368

| Household | Number of Specimens Sequenced | Date First Specimen | Date Last Specimen | Nextclade Clade <sup>a</sup> | PANGO lineage <sup>b</sup> | Mean Consensus Diff <sup>c</sup> |
|-----------|-------------------------------|---------------------|--------------------|------------------------------|----------------------------|----------------------------------|
| PR1       | 3                             | 9/2/20              | 9/8/20             | 20C                          | B.1.426                    | 0                                |
| UT1       | 3                             | 10/14/20            | 10/15/20           | 20G                          | B.1.2                      | 0                                |
| PR2       | 4                             | 10/24/20            | 10/30/20           | 20C                          | B.1.588                    | 0.5                              |
| UT2       | 4                             | 11/17/20            | 11/24/20           | 20B                          | B.1.1                      | 0.5                              |
| UT3       | 6                             | 11/24/20            | 12/2/20            | 20G                          | B.1.2                      | 1.4                              |
| UT4       | 4                             | 11/30/20            | 12/7/20            | 20B                          | B.1.1                      | 1.5                              |
| UT5       | 2                             | 12/2/20             | 12/3/20            | 20A                          | B.1.400                    | 1                                |
| UT6       | 3                             | 12/3/20             | 12/10/20           | 20G                          | B.1.2                      | 0.67                             |
| PR3       | 4                             | 12/3/20             | 12/11/20           | 20B                          | B.1.1.486                  | 1.17                             |
| UT7       | 3                             | 12/15/20            | 12/28/20           | 20A                          | B.1.596                    | 0                                |
| UT8       | 2                             | 12/28/20            | 1/1/21             | 21C (Epsilon)                | B.1.429                    | 0                                |
| UT9       | 2                             | 1/12/21             | 1/14/21            | 20A                          | B.1.400                    | 0                                |
| NY1       | 3                             | 1/29/21             | 2/4/21             | 21F (iota)                   | B.1.526                    | 0.67                             |
| PR4       | 2                             | 2/8/21              | 2/8/21             | 20A                          | B.1.240                    | 0                                |
| NY2       | 3                             | 2/9/21              | 2/9/21             | 21F (iota)                   | B.1.526                    | 0                                |
| NY3       | 3                             | 2/11/21             | 2/18/21            | 20C                          | B.1.582                    | 0                                |
| NY4       | 2                             | 2/21/21             | 3/5/21             | 21F (iota)                   | B.1.526                    | 0                                |
| NY5       | 2                             | 2/23/21             | 2/23/21            | 21F (iota)                   | B.1.526                    | 0                                |
| NY6       | 6                             | 2/24/21             | 3/11/21            | 20C                          | B.1.637                    | 1.13                             |
| UT10      | 2                             | 3/1/21              | 3/15/21            | 21C (Epsilon)                | B.1.427                    | 2                                |
| NY7       | 3                             | 3/3/21              | 3/16/21            | 20C                          | B.1.637                    | 0                                |
| NY8       | 2                             | 3/22/21             | 4/4/21             | 21F (iota)                   | B.1.526                    | 0                                |
| PR5       | 2                             | 3/23/21             | 3/30/21            | 20B                          | R.1                        | 0                                |
| PR6       | 3                             | 4/23/21             | 4/23/21            | 20I (Alpha,V1)               | Q.4                        | 0                                |
| UT11      | 3                             | 7/26/21             | 8/10/21            | 21J (Delta)                  | AY.44                      | 0                                |
| UT12      | 2                             | 8/4/21              | 8/4/21             | 21J (Delta)                  | AY.44                      | 1                                |

a Defined using nextclade, <https://clades.nextstrain.org>

b Defined using pango, <https://cov-lineages.org/resources/pangolin.html>

c Total number of pairwise unambiguous consensus differences between sequences divided by total number of sequences in a household

369  
370

371 **FIGURE LEGENDS**

372

373 **Fig. 1: Cases and sampling density.** Columns show the number of SARS-CoV-2 infections (left y-  
374 axis) in households from New York (NY, top), Puerto Rico (PR, middle), and Utah (UT, bottom)  
375 cohorts by epiweek (x-axis). The sampling density (line) for community genomes in each state  
376 or territory (right y-axis) was estimated as the proportion of cases with sequences available on  
377 GISAID.

378

379 **Fig. 2: Phylogenetic trees of sequences from households where all participants had**  
380 **indistinguishable consensus sequences.** Shown are four representative trees. Trees from 11  
381 other households are shown in Supplemental Figures 1-4. Each tree is labeled with the  
382 household identifier (NY = New York, UT = Utah, PR = Puerto Rico). The tips of household  
383 sequences are colored cyan and those from non-household participants in the same community  
384 in the same state or territory (2 letter abbreviation) are colored magenta. All other tips are  
385 colored black. The collection date for each specimen is indicated. Genetic distance is  
386 represented by the bar and corresponds to one mutation.

387

388 **Fig. 3: Phylogenetic trees of sequences from households where participants had distinct**  
389 **consensus sequences.** Shown are four representative trees. Trees from 7 other households are  
390 shown in Supplemental Figure 5. Each tree is labeled with the household identifier (NY = New  
391 York, UT = Utah, PR = Puerto Rico). The tips of household sequences are colored cyan and those  
392 from the same state or territory (2 letter abbreviation) are colored magenta. All other tips are

393 colored black. The collection date for each sample is indicated. Genetic distance is represented  
394 by the bar and corresponds to one mutation.

395  
396 **Fig. 4: Shared single nucleotide polymorphisms within households.** Each panel shows one of  
397 the 8 households in which members shared a polymorphic site. The frequency (5-95%) of the  
398 indicated mutation (relative to the Wuhan/Hu-1 reference) is shown on the y-axis and the  
399 individual/sequence identifier is shown on the x-axis. Shared variants that did and did not lead  
400 to a consensus level difference between household members are shown as circles and  
401 diamonds, respectively. Mutations that are fixed (>95% frequency) are shown as squares.

402  
403 **Supplemental Figures 1-4: Phylogenetic trees of sequences from households where all**  
404 **participants had indistinguishable consensus sequences.** Each tree is labeled with the  
405 household identifier (NY = New York, UT = Utah, PR = Puerto Rico). The tips of household  
406 sequences are colored cyan and those from the same state or territory (2 letter abbreviation)  
407 are colored magenta. All other tips are colored black. The collection date for each sample is  
408 indicated. Genetic distance is represented by the bar and corresponds to one mutation.

409  
410 **Supplemental Figure 5: Phylogenetic trees of sequences from seven households where**  
411 **participants had distinct consensus sequences.** Each tree is labeled with the household  
412 identifier (NY = New York, UT = Utah, PR = Puerto Rico). The tips of household sequences are  
413 colored cyan and those from the same state or territory (2 letter abbreviation) are colored

414 magenta. All other tips are colored black. The collection date for each sample is indicated.

415 Genetic distance is represented by the bar and corresponds to one mutation.

416

417 **Supplemental Table 1:** Submitting laboratories for GISAID sequences used in this study. GISAID

418 identifiers can be found in the unedited trees in the Supplemental Dataset.

419



Figure 1

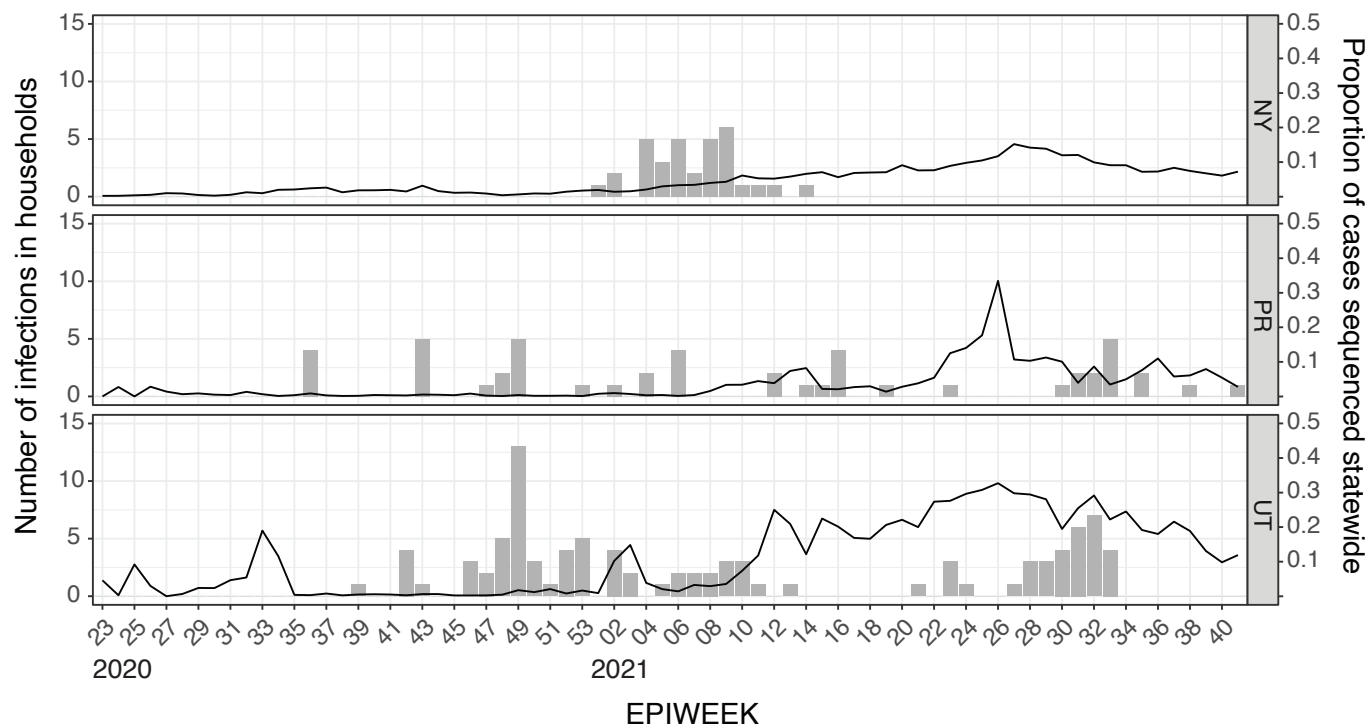

Figure 2

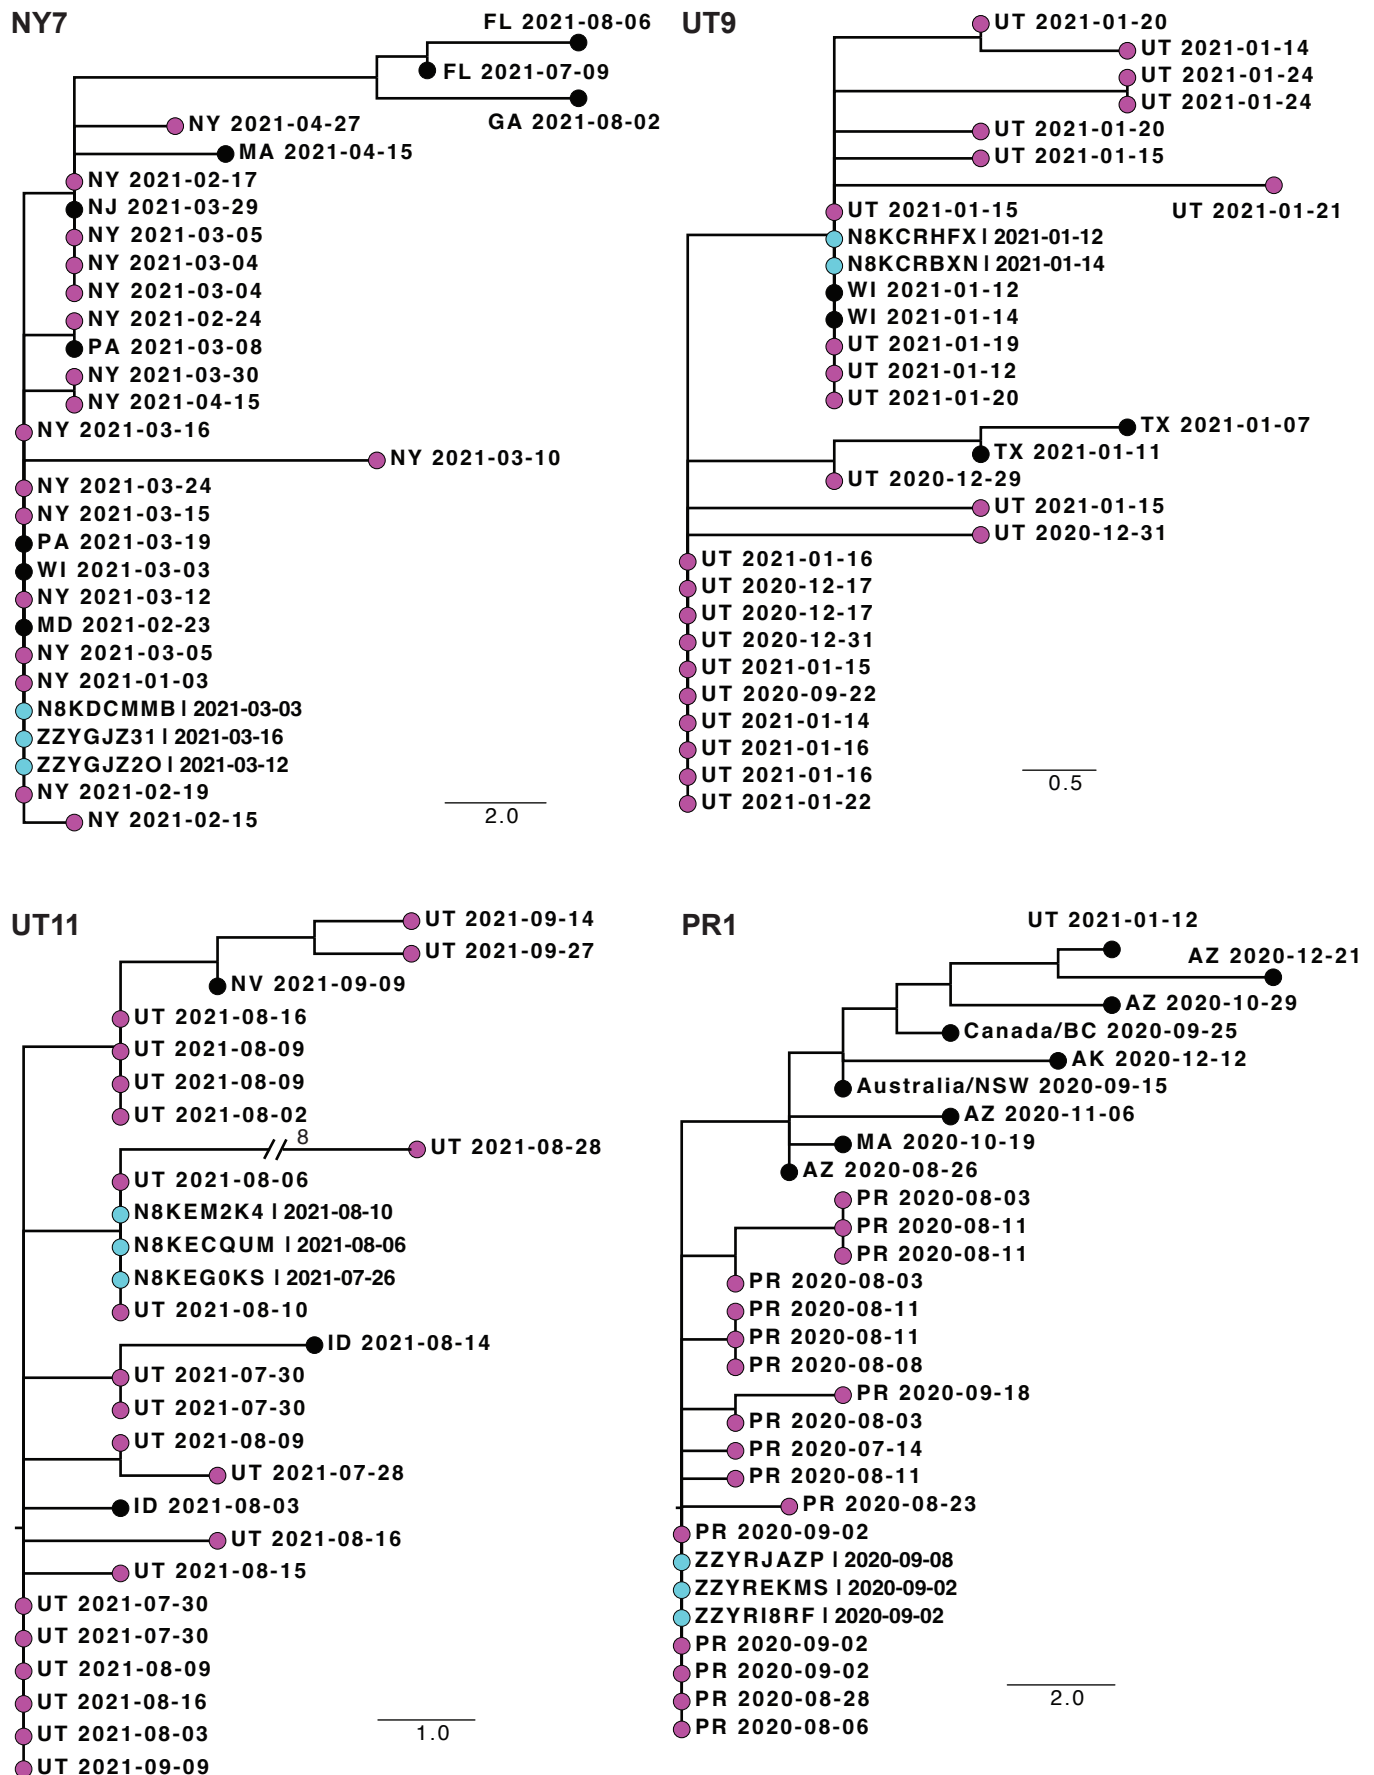

**Figure 3**

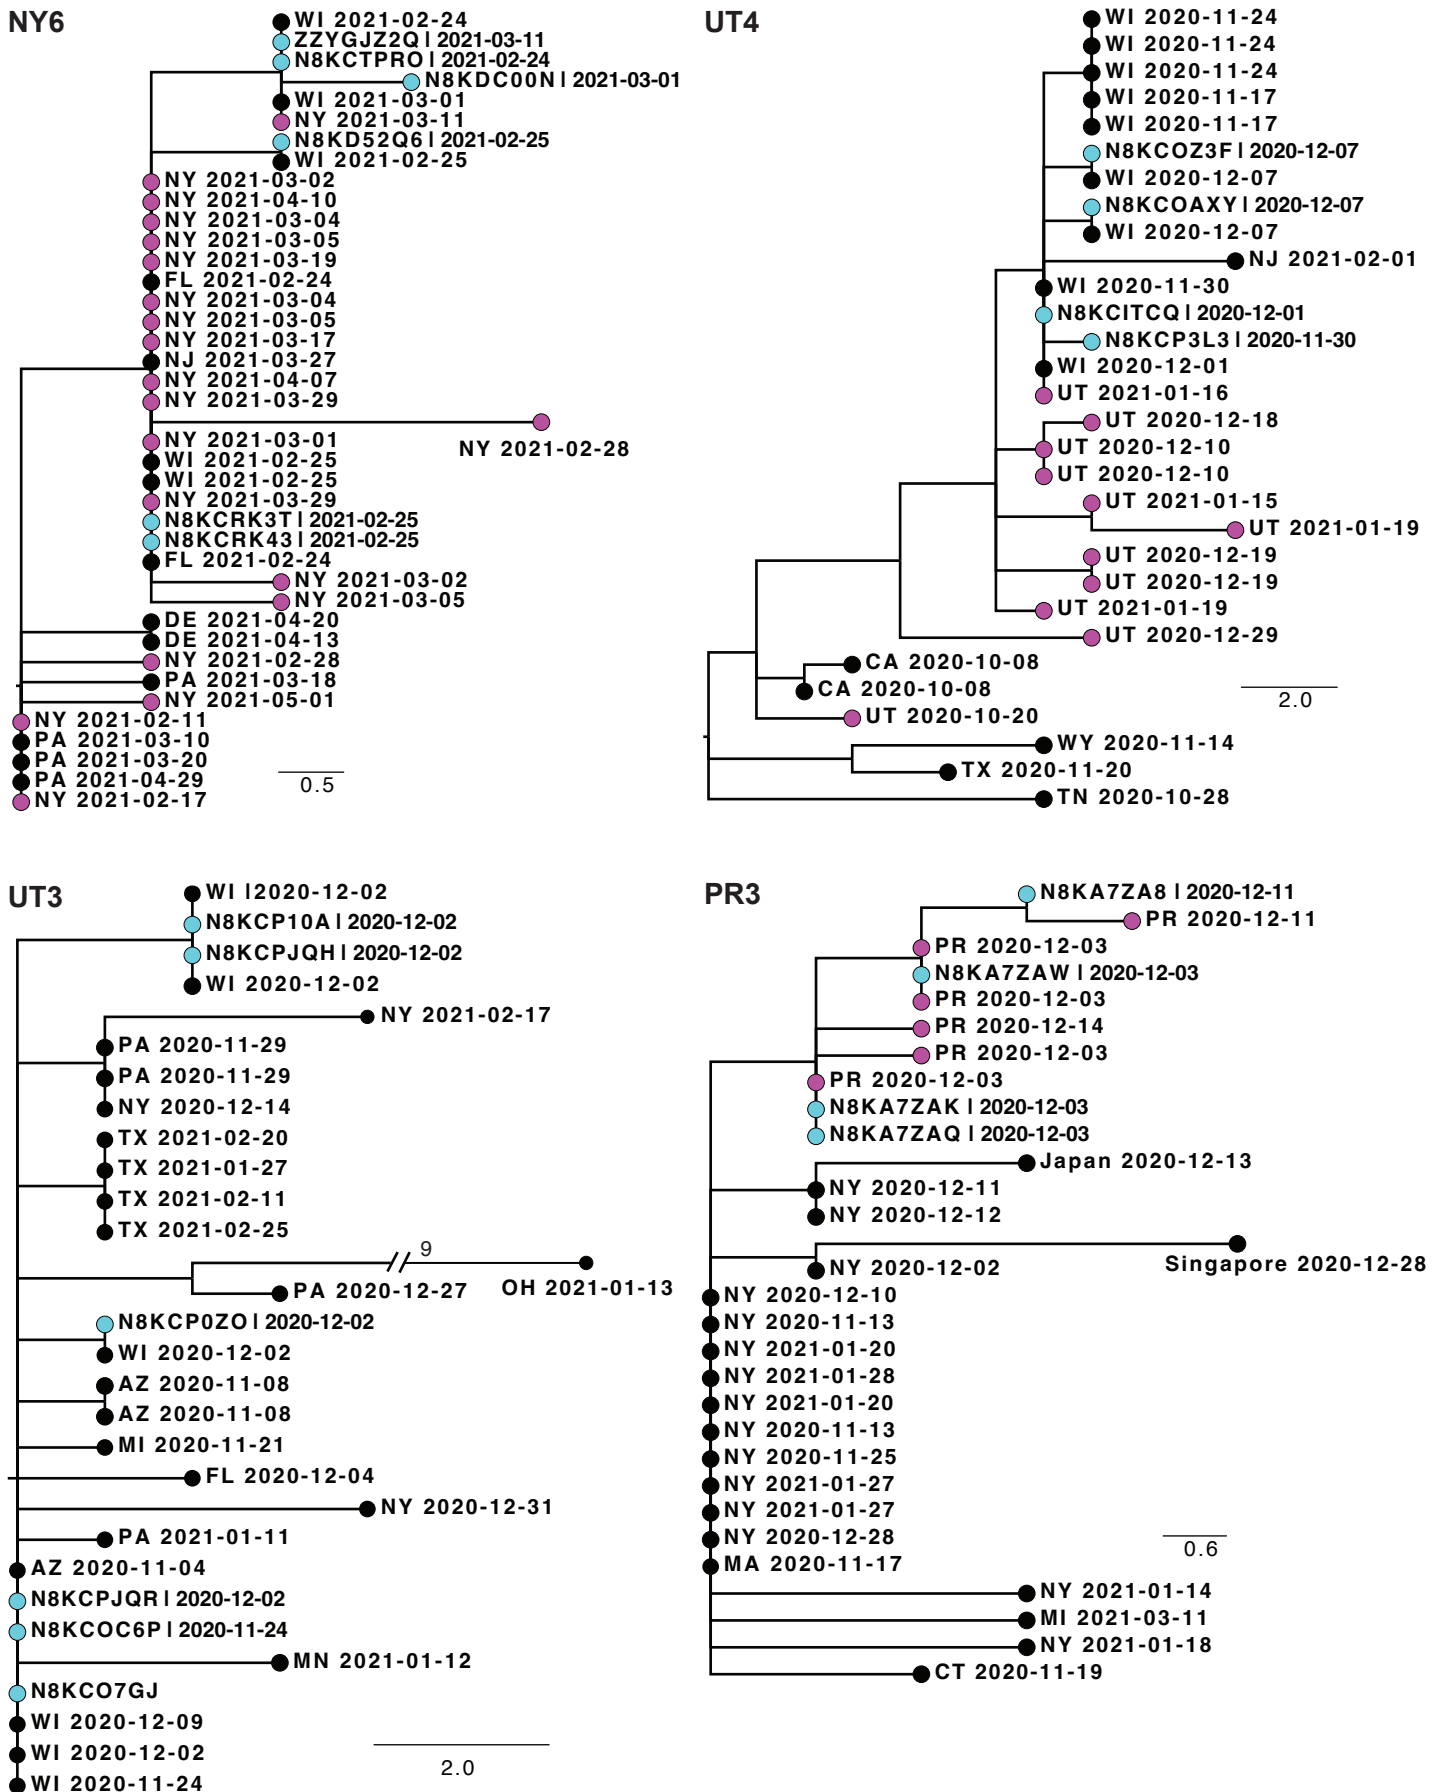

Figure 4

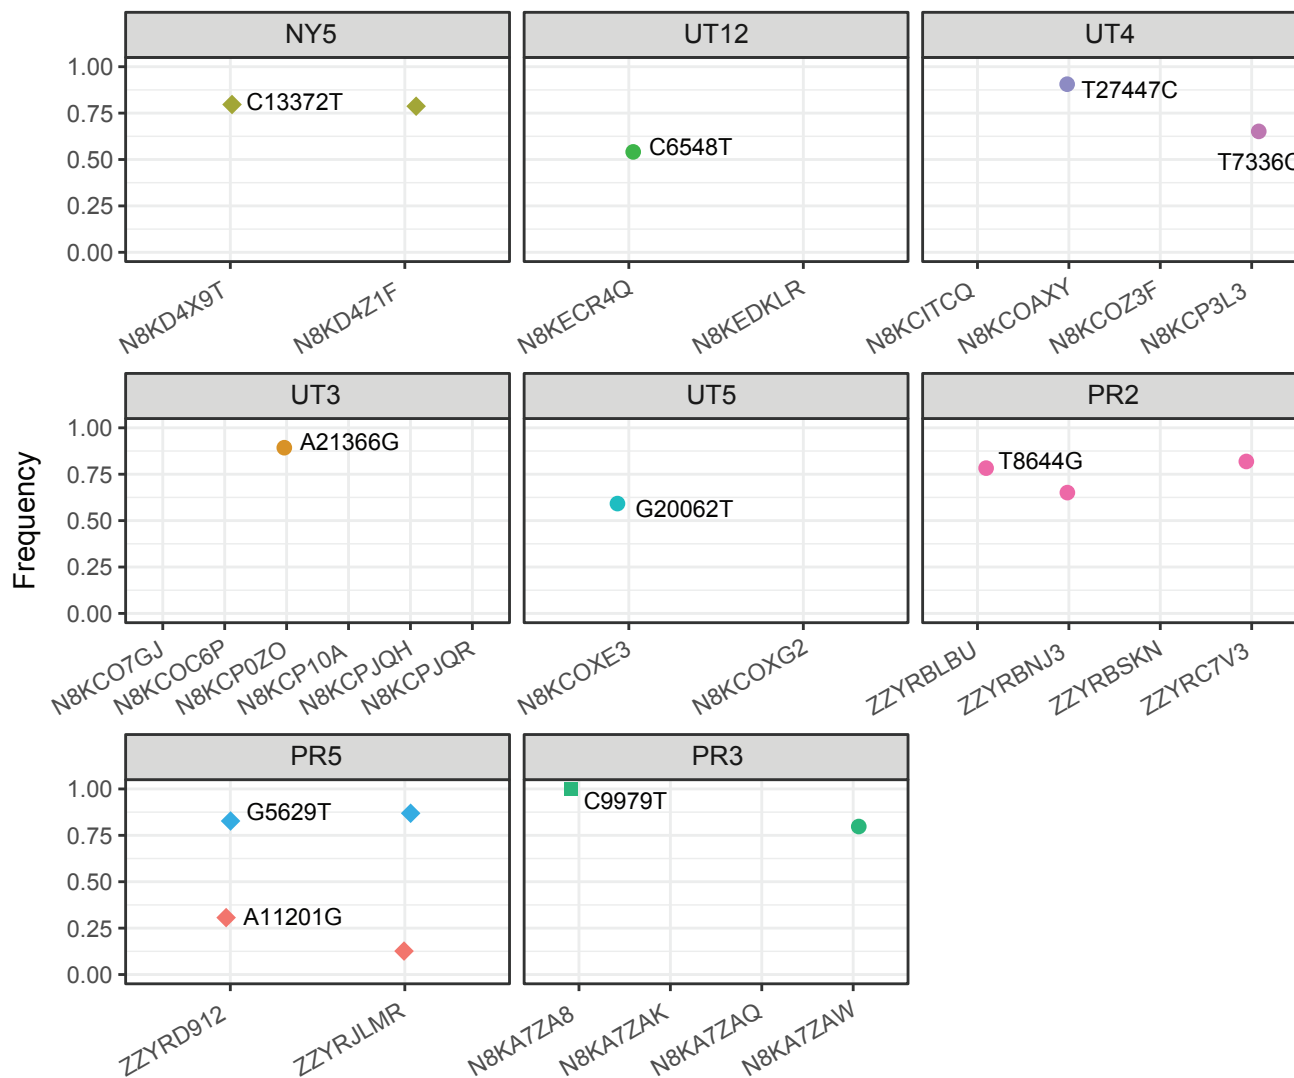

## Supplemental Figure 1

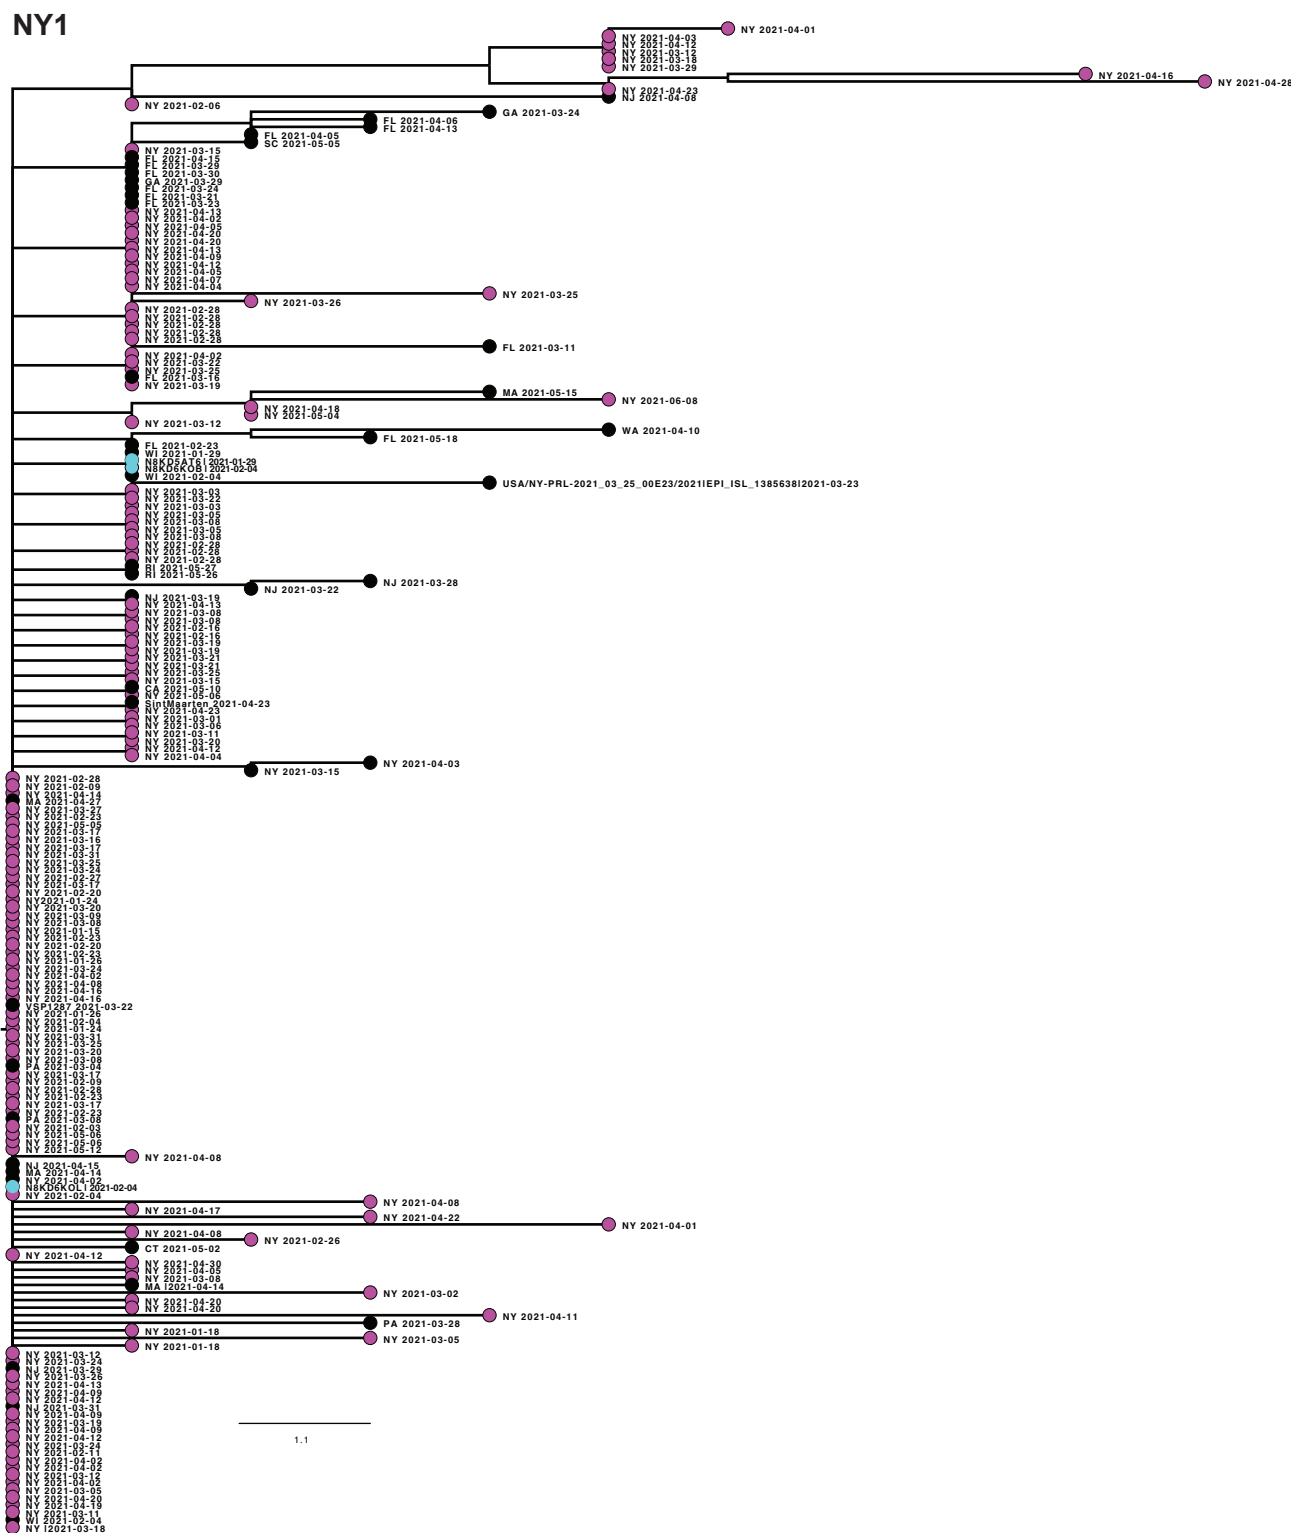

## Supplemental Figure 2

NY2

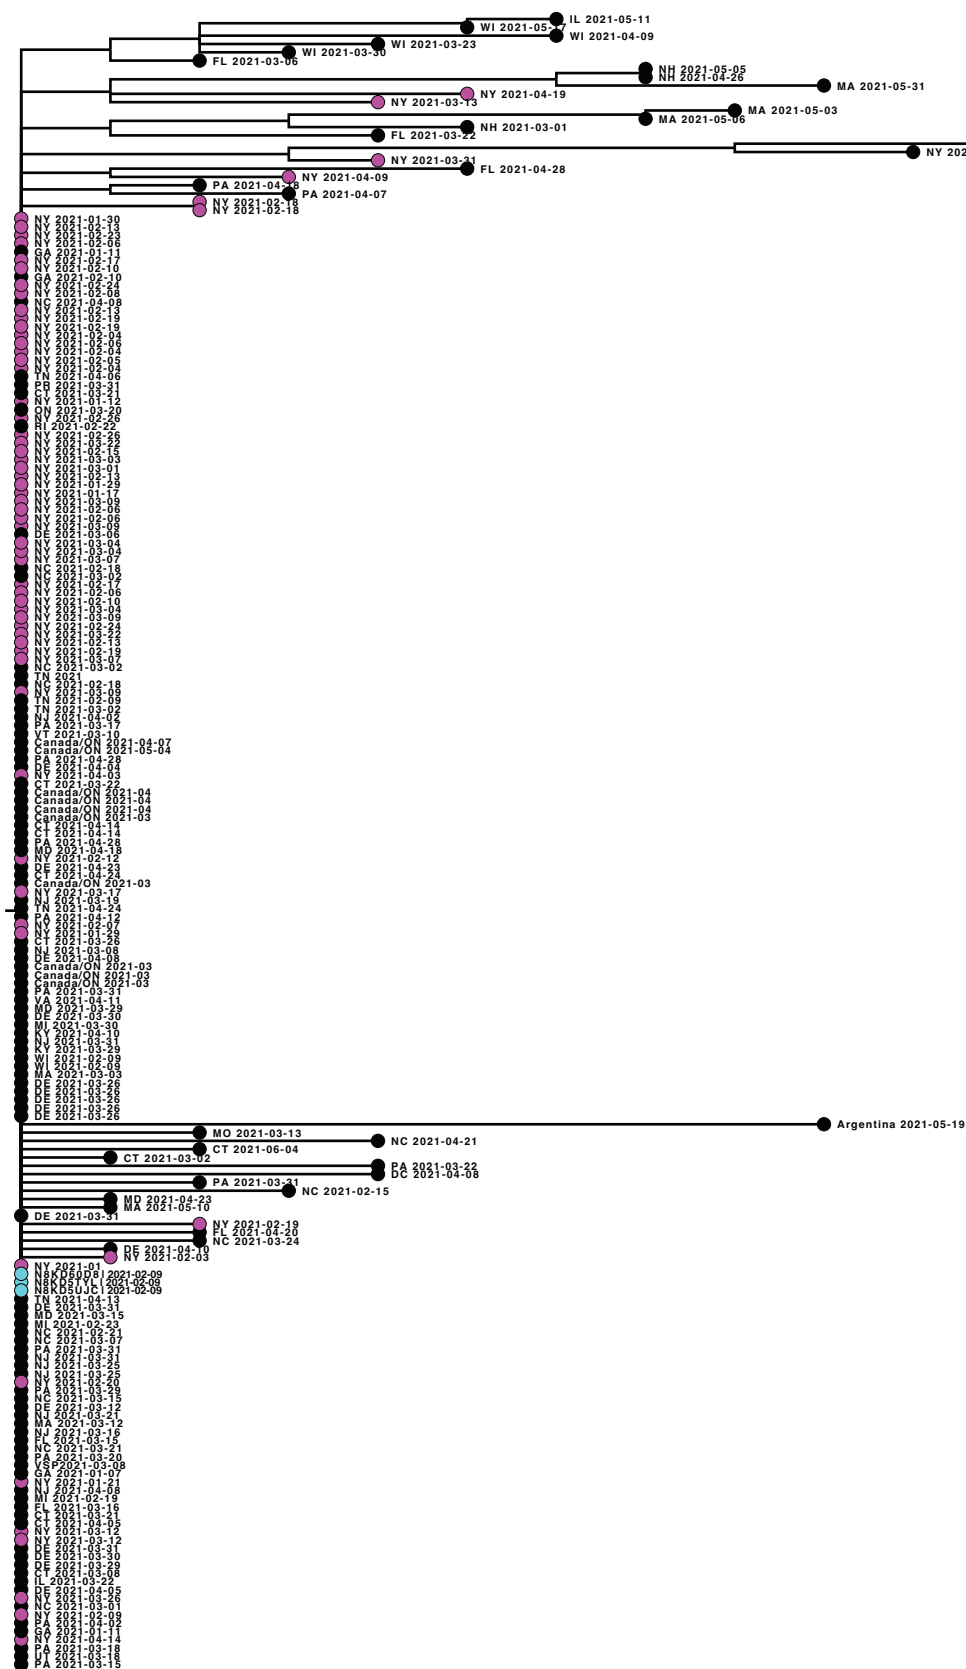

### Supplemental Figure 3

UT1

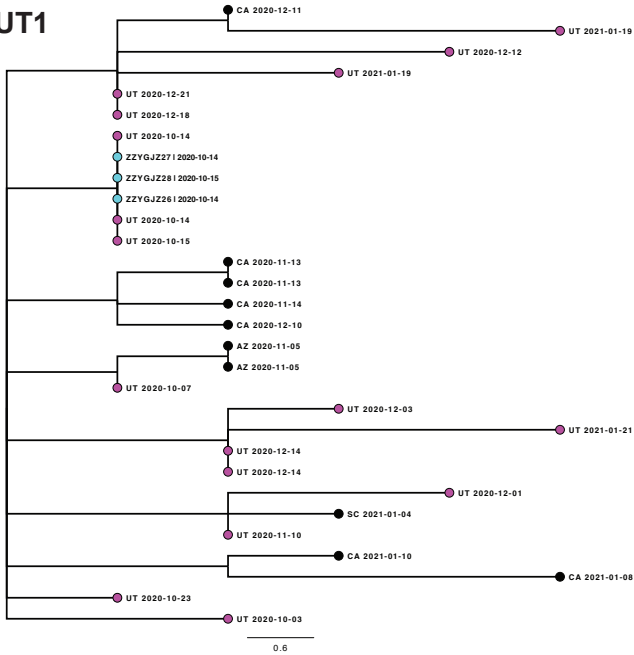

UT7

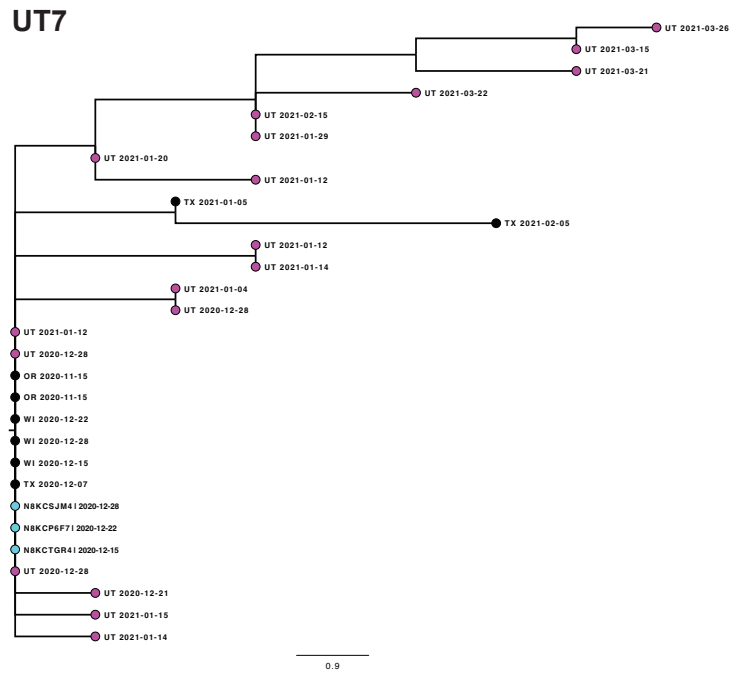

PR5

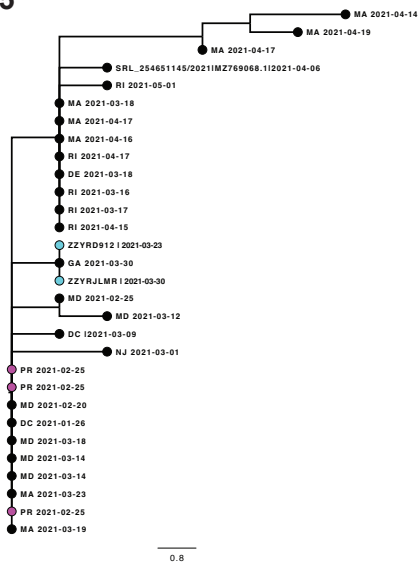

PR6

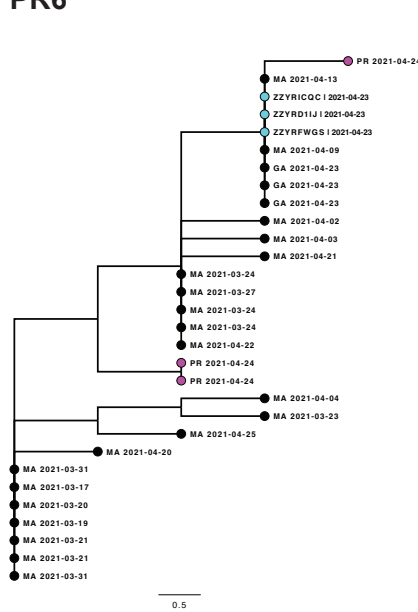

PR4

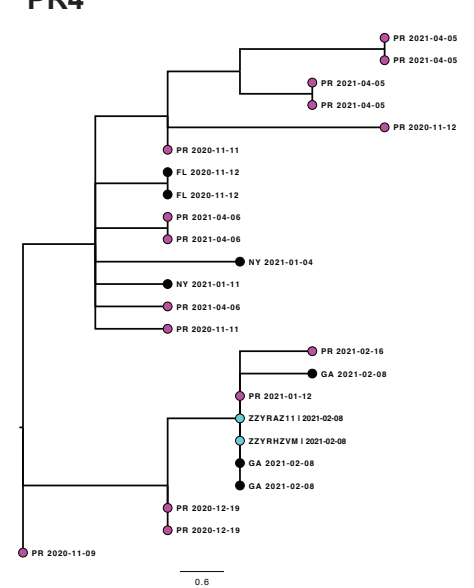

## Supplemental Figure 4

### NY4

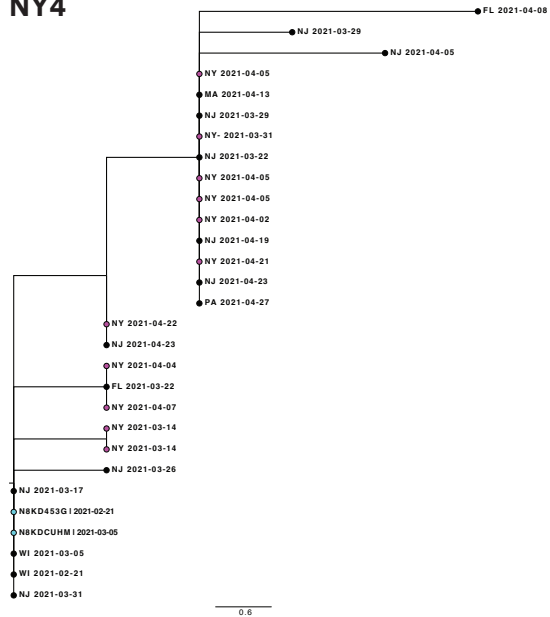

### NY8

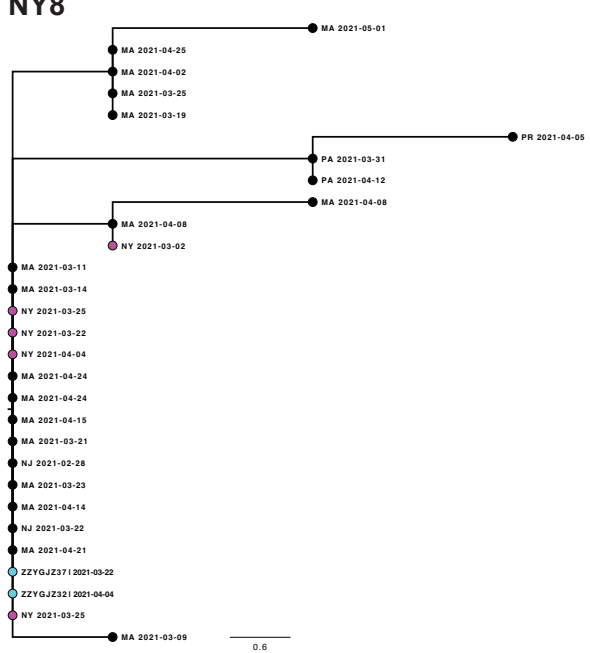

### NY3

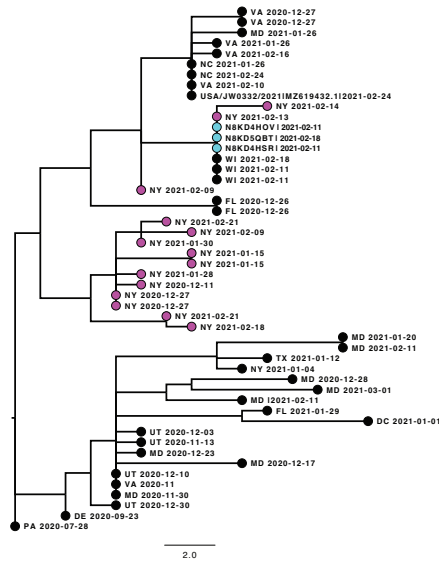

### NY5

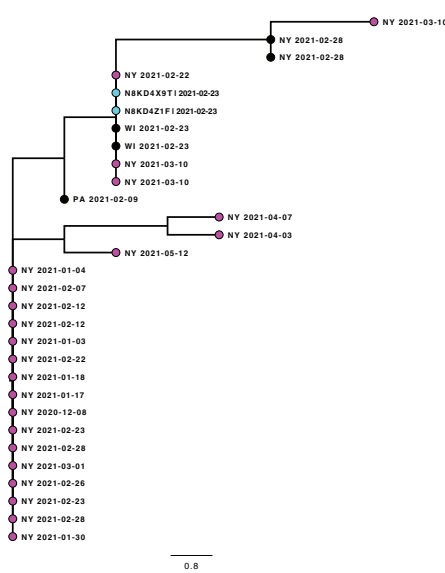



## Supplemental Figure 5

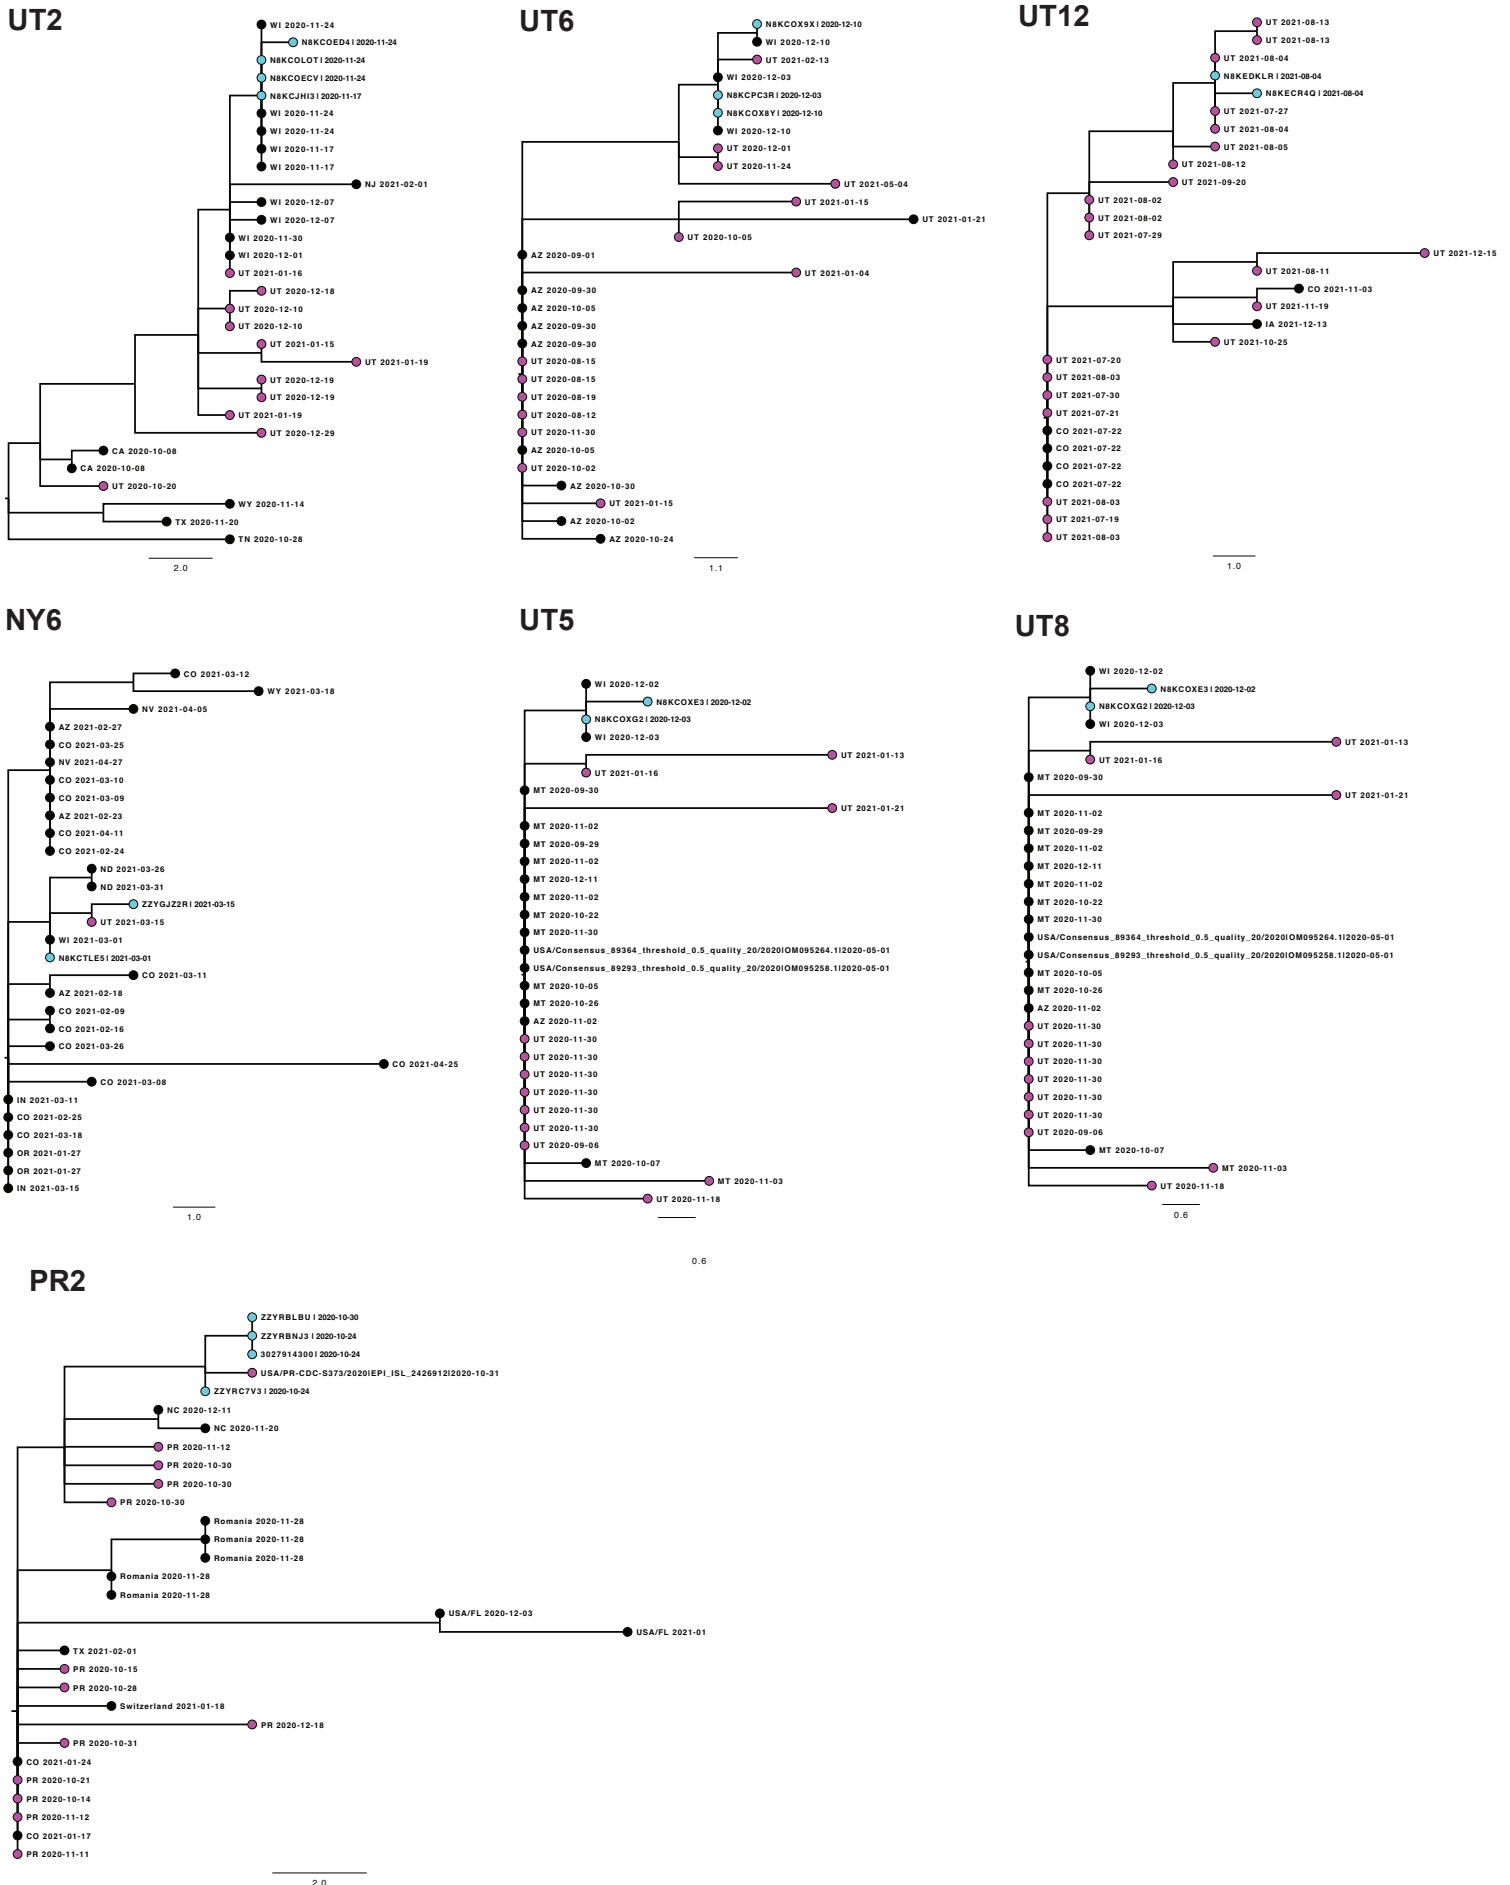

Source: https://medrxiv.org/content/10.1101/2022.08.09.22278452v2.full.pdf
